# Supplementary material for: Exercise Attenuates the Transition from Fatty Liver to Steatohepatitis and Reduces Tumor Formation in Mice
Source: PubMed Central journal article supplement (PMC7352494; doi:10.3390/cancers12061407), 2020-05-29
Supplement: cancers-12-01407-s001.pdf [file cancers-12-01407-s001.pdf]

## Exercise attenuates the transition from fatty liver to steatohepatitis and reduces tumor formation in mice

Maria Guarino, Pavitra Kumar, Andrea Felser, Luigi M. Terracciano, Sergi Guixé-Muntet, Bostjan Humar, Michelangelo Foti, Jean-Marc Nuoffer, Marie V. St-Pierre and Jean-François Dufour

Figure S1

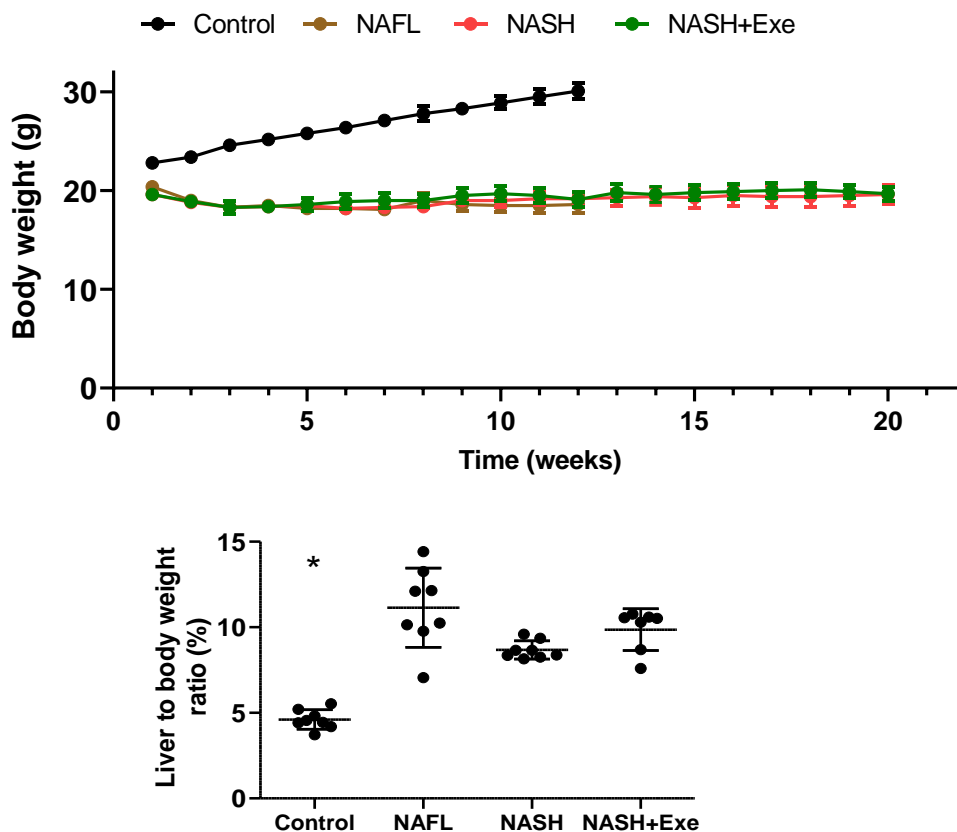

**Figure S1:** Comparison of body weight and of liver to body weight ratios. C57Bl/6N mice were fed a standard or choline-deficient high-fat (CD-HFD) diet. Mice were randomized to one of four groups: (1) control (n = 11) fed a standard diet for 12 weeks; (2) non-alcoholic fatty liver (NAFL) group (n = 11) fed a CD-HFD diet for 12 weeks; (3) non-alcoholic steatohepatitis (NASH) sedentary group (n = 11) fed a CD-HFD for 20 weeks; (4) NASH + exercise (EXE) group (n = 11) fed a CD-HFD for 20 weeks but with treadmill running at 12.5 m/min imposed from weeks 12 to 20. Body weights were recorded weekly after 7 days of habituation to the diet (upper panel). Tissues were harvested after 12 weeks (control, NAFL) or 20 weeks (NASH sedentary, NASH+ EXE) (lower panel). The liver/body weight ratio was increased in all groups fed the CD-HFD. ( $p < 0.05$ , One way ANOVA).

## Figure S2. Unabridged western blot images

### Figure 5D

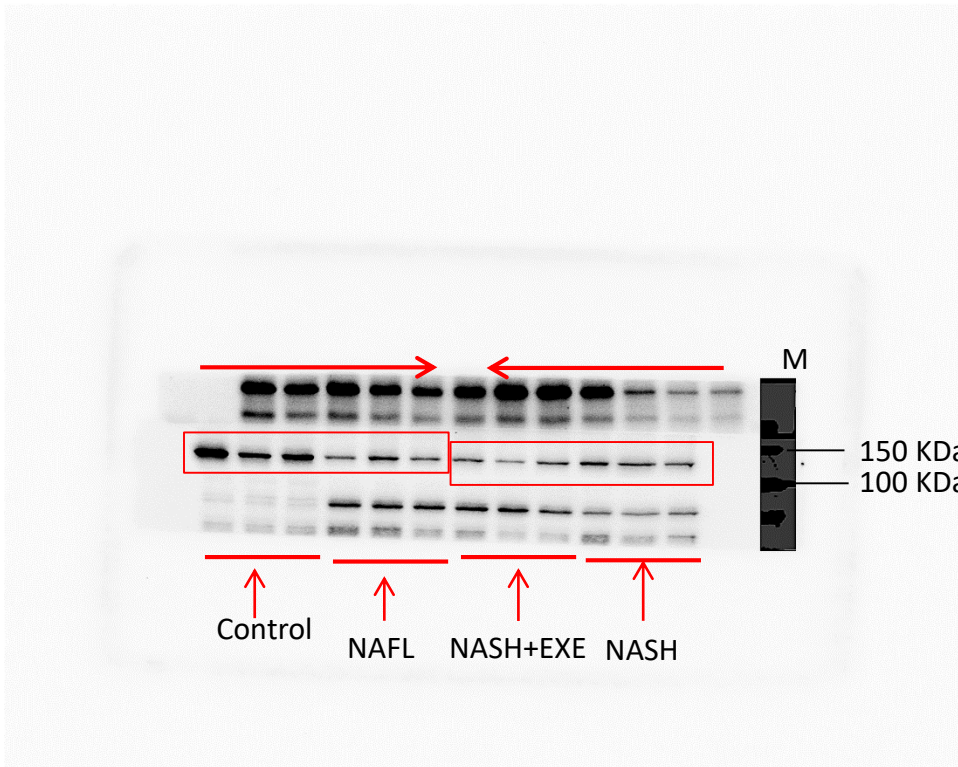

P-ATPCL  
(predicted MW  
125 KDa)

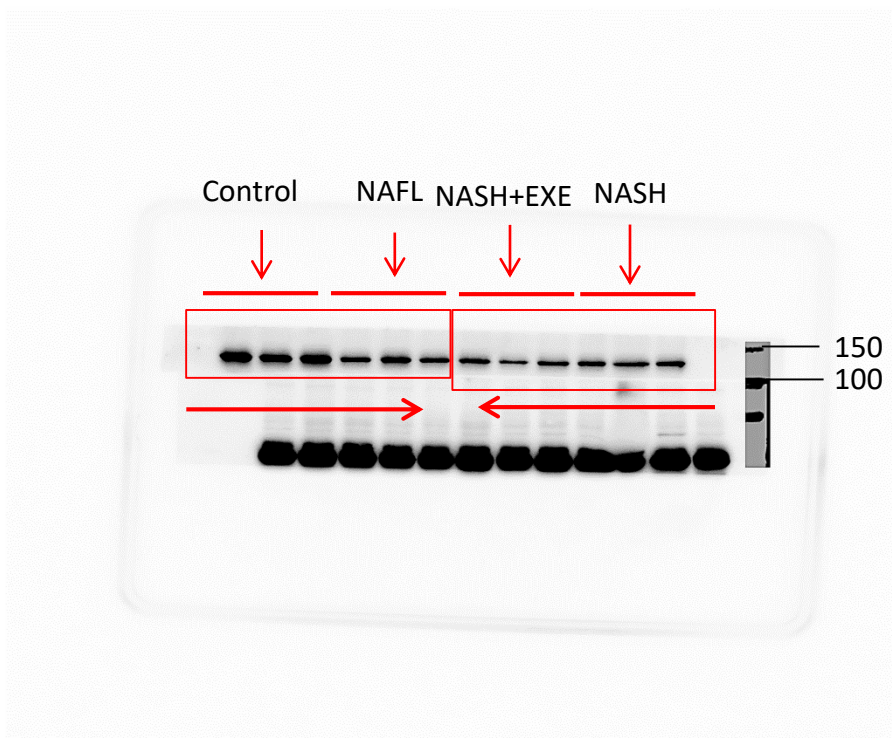

ATPCL (predicted  
MW 125 KDa)

Figure 5D continued

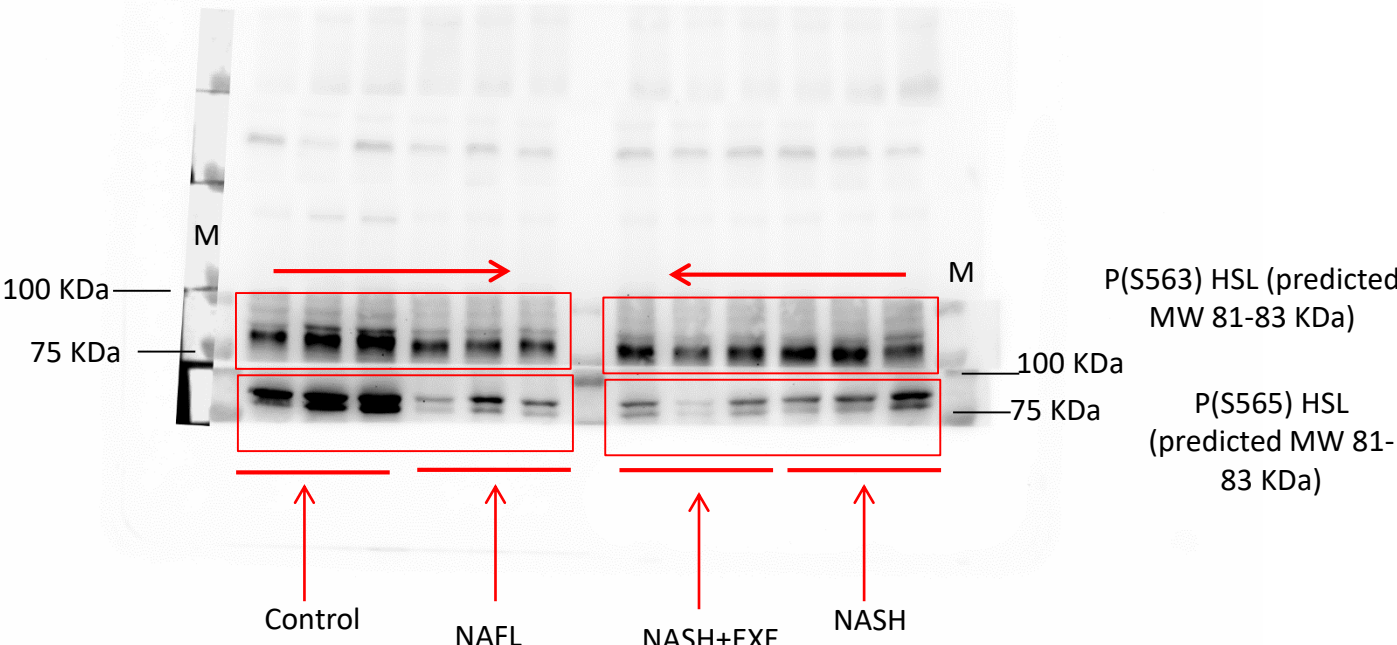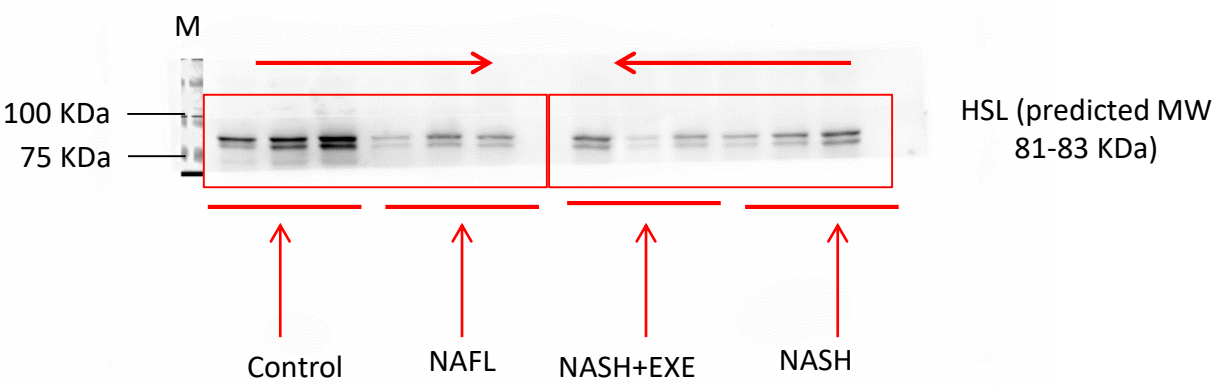

Figure 5D continued

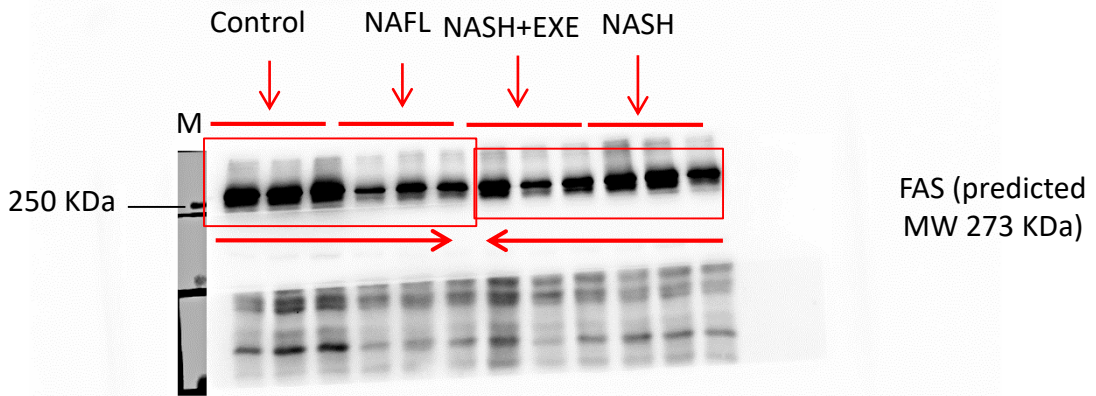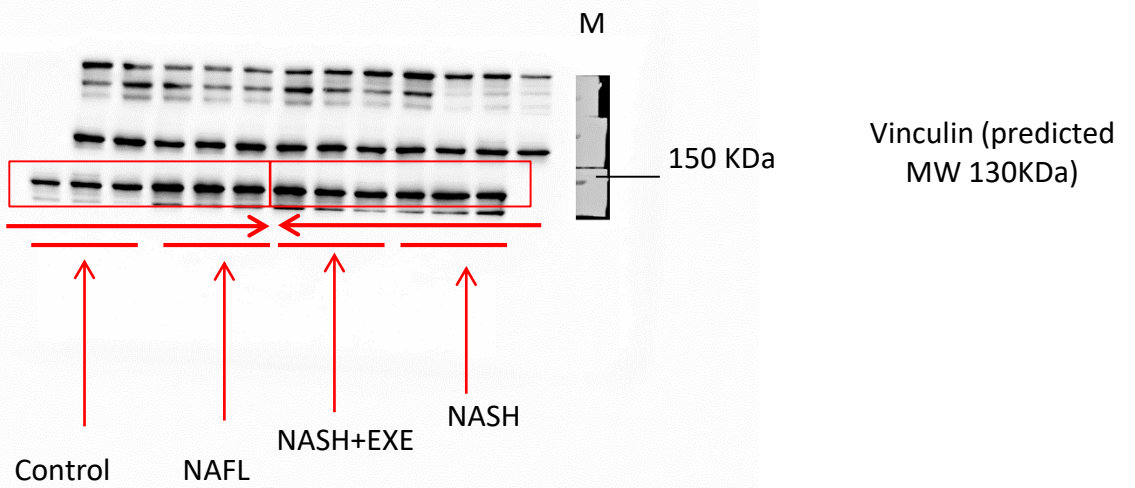

Figure 5D continued

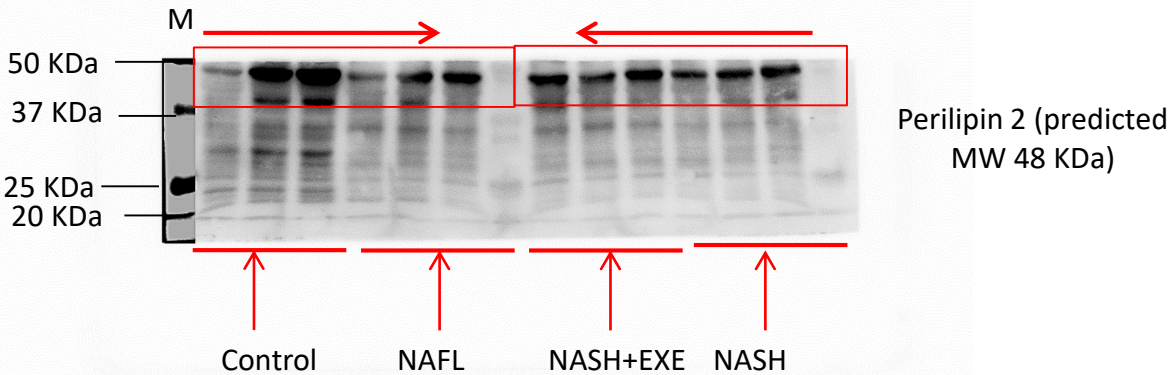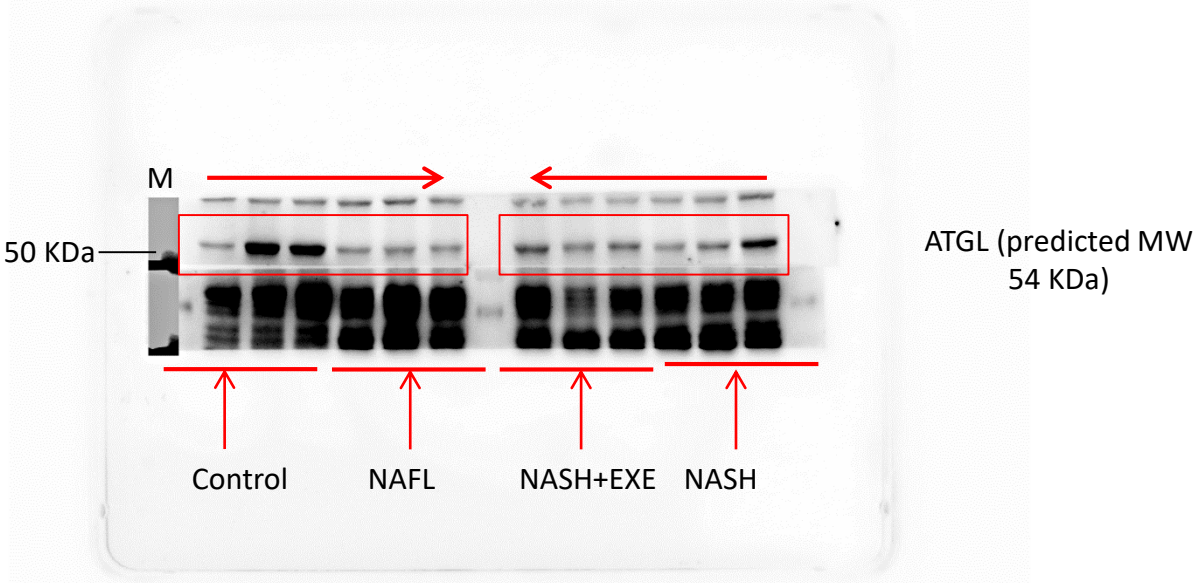

Figure 5D continued

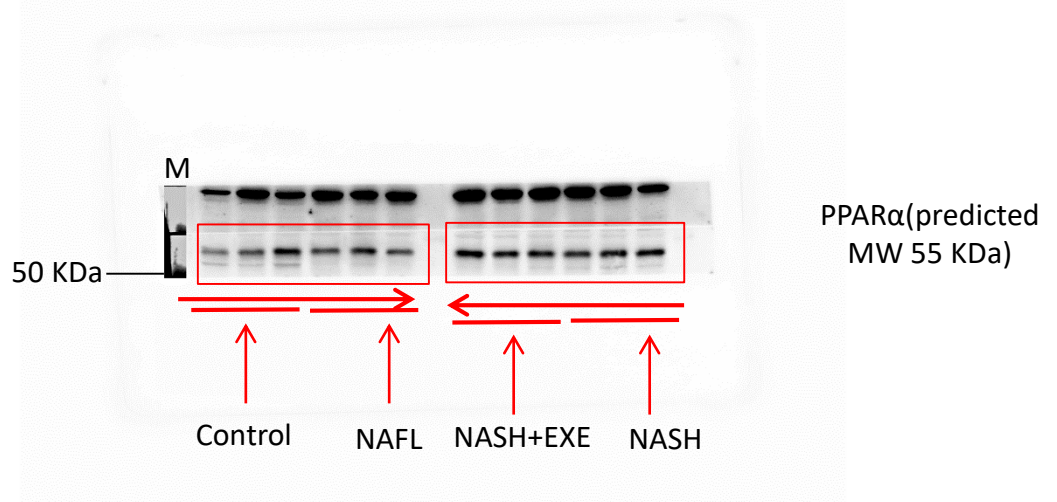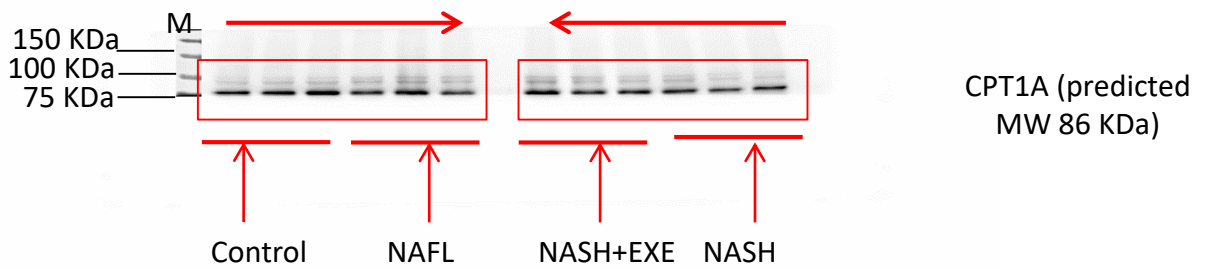

# Figure 5D continued

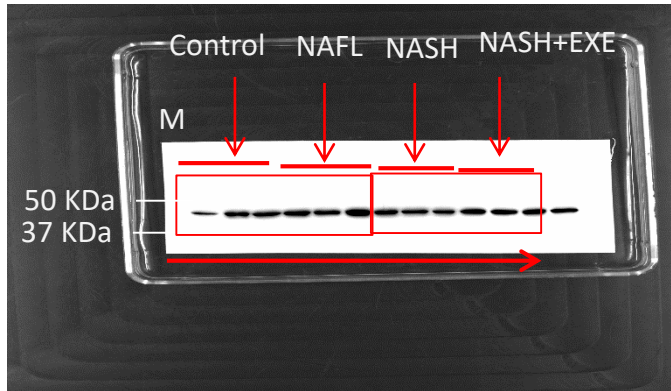

MCAD (predicted  
MW 47 KDa)

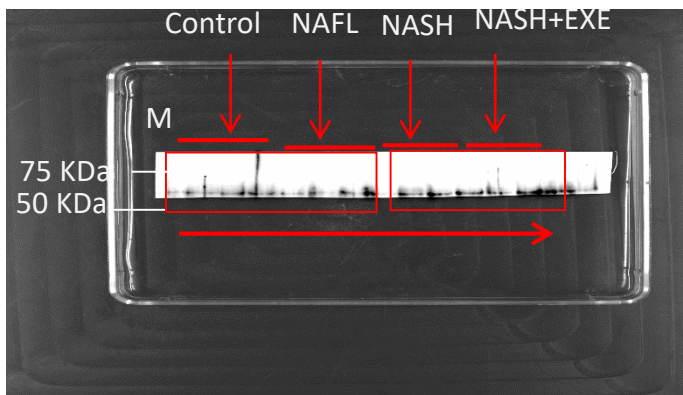

DGAT1 (predicted  
MW 60 KDa)

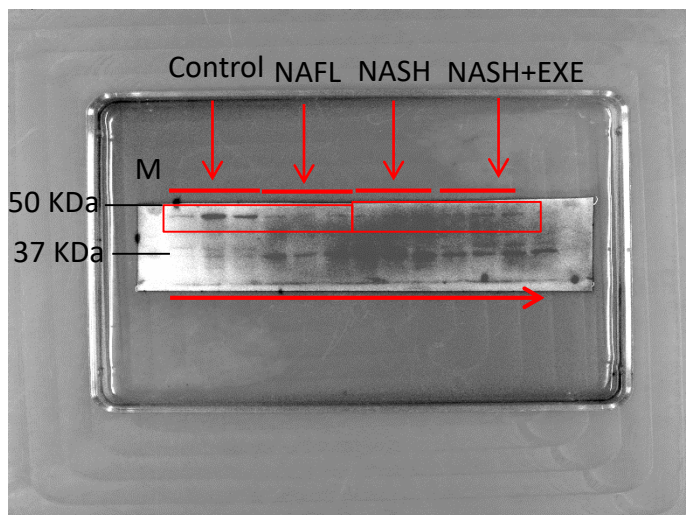

DGAT2 (predicted  
MW ~47 KDa)

**Figure 7**

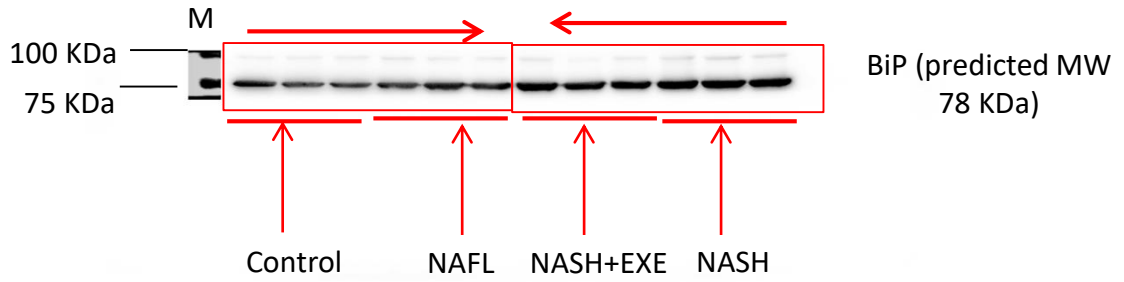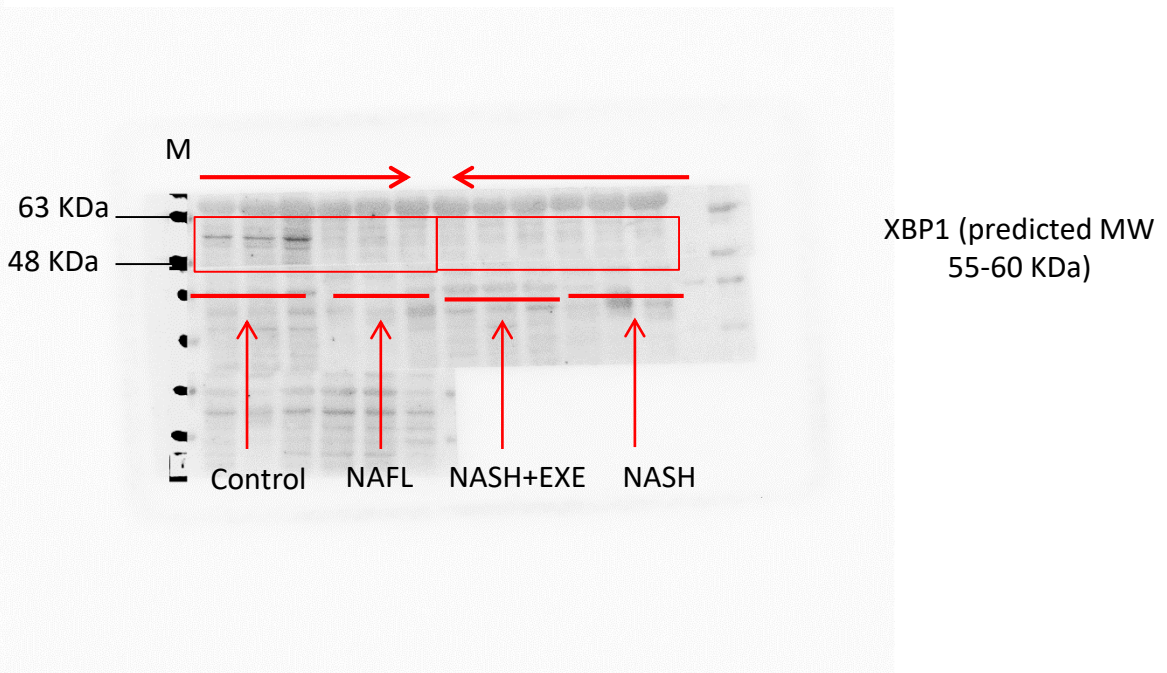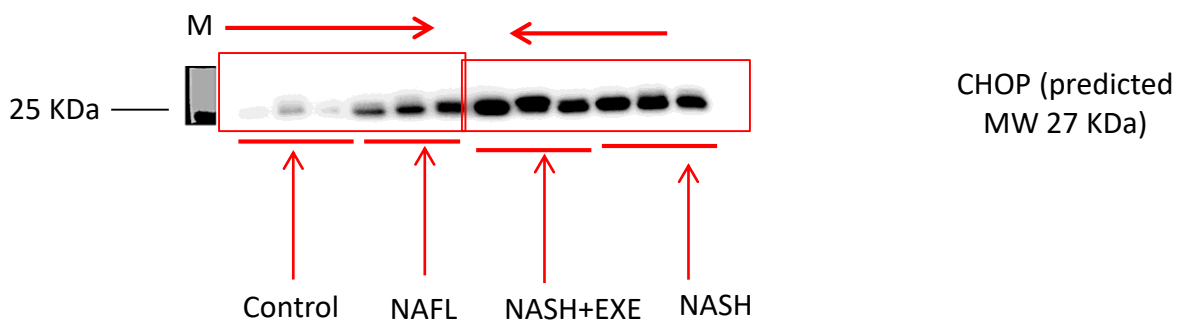



Figure 7 continued

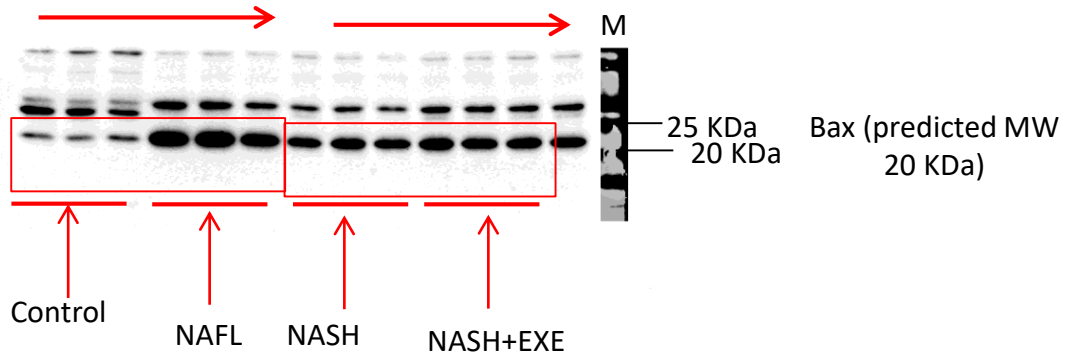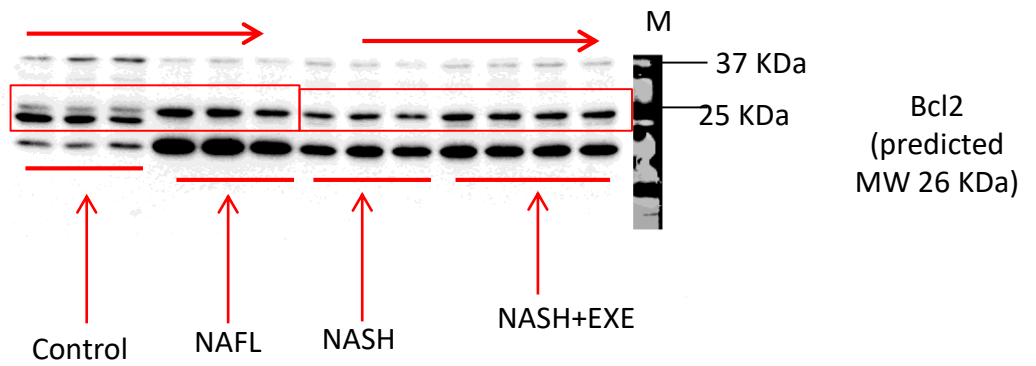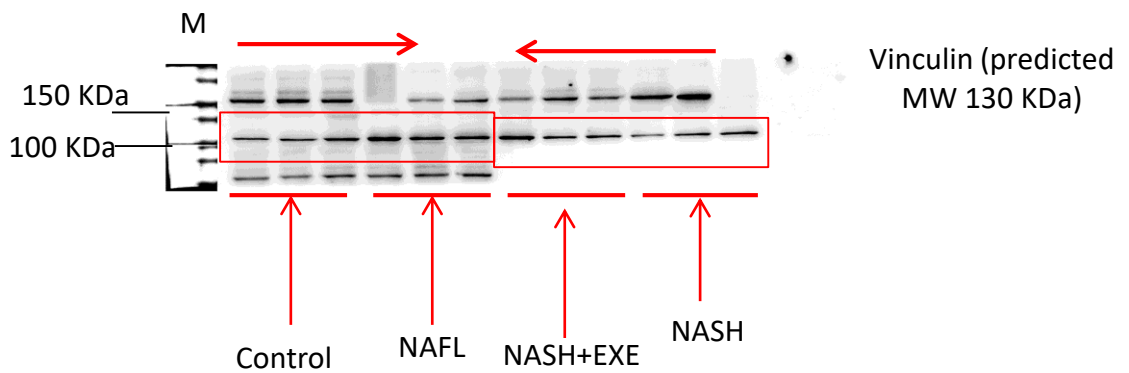

**Figure 8**

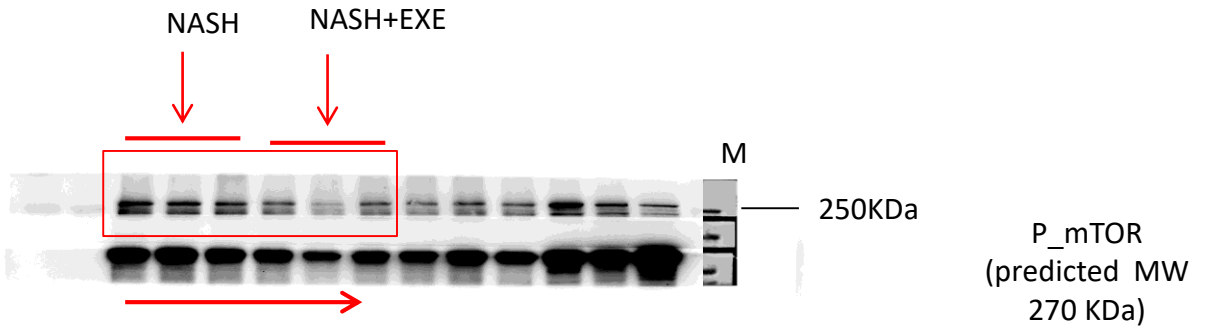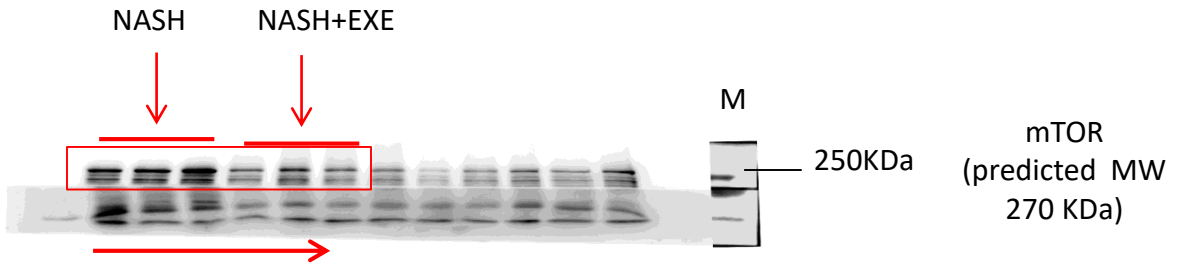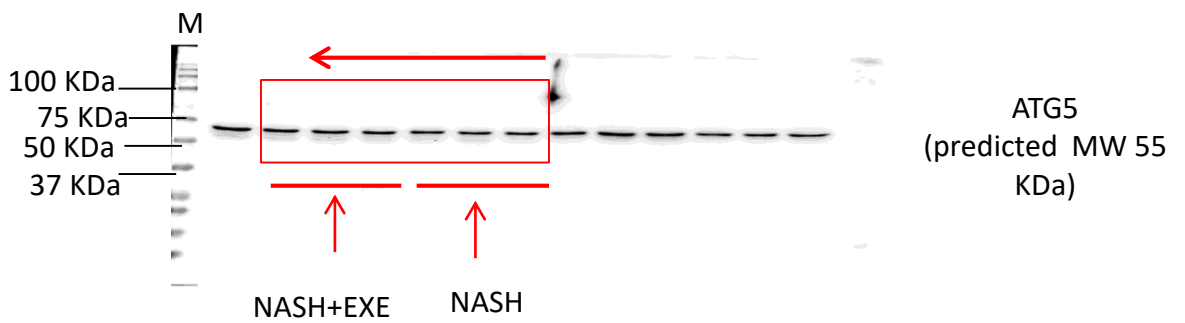

Figure 8 continued

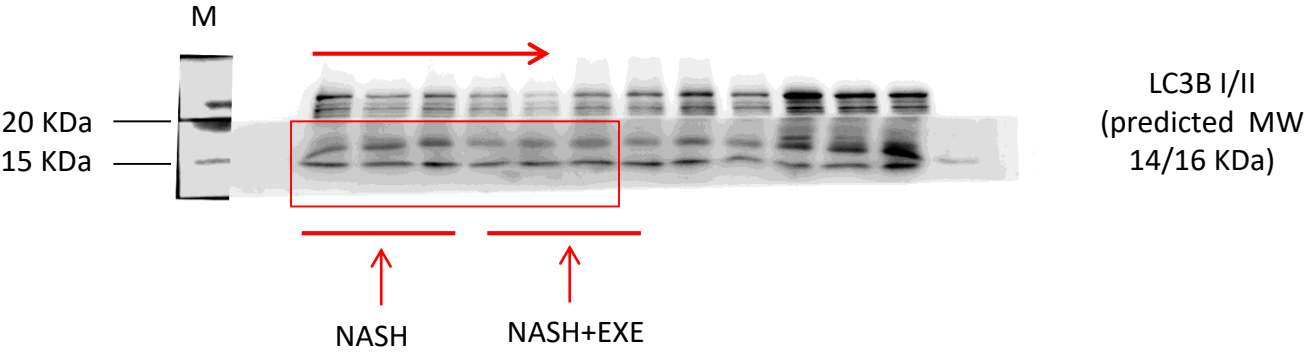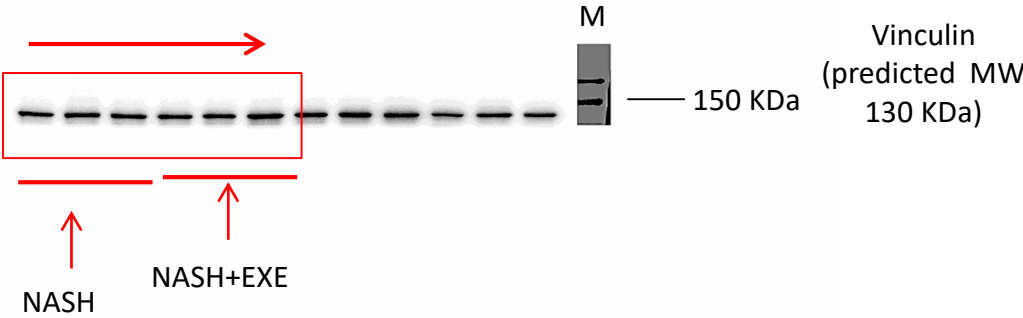

Figure 8 continued

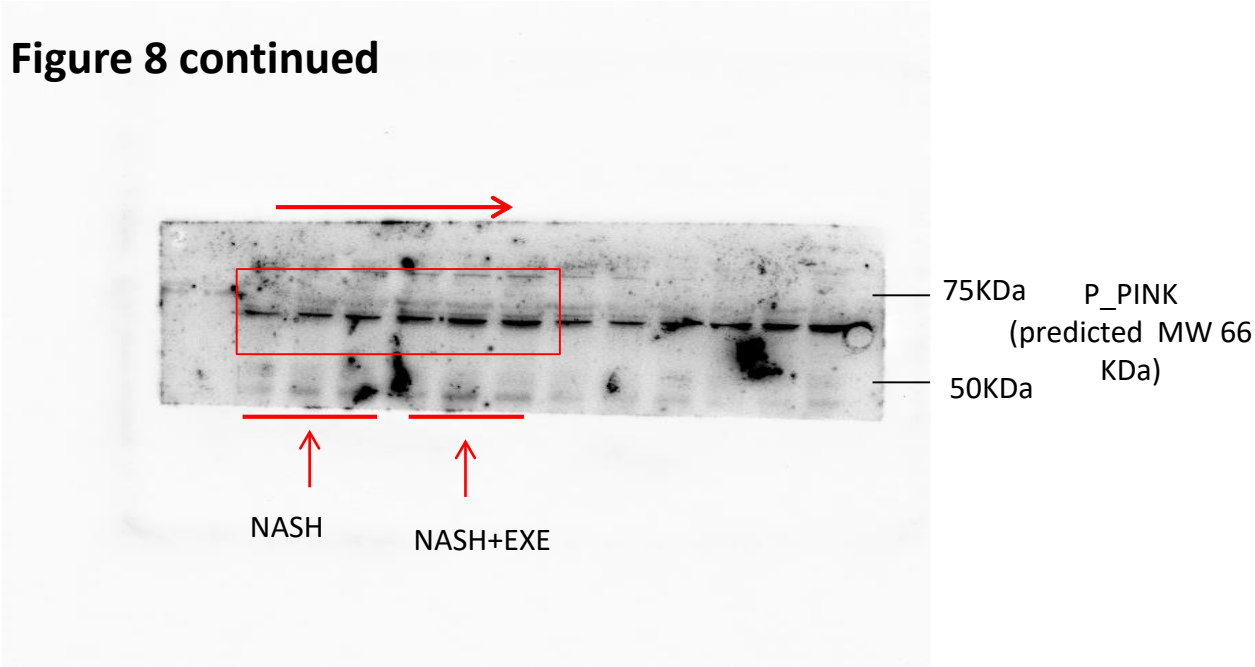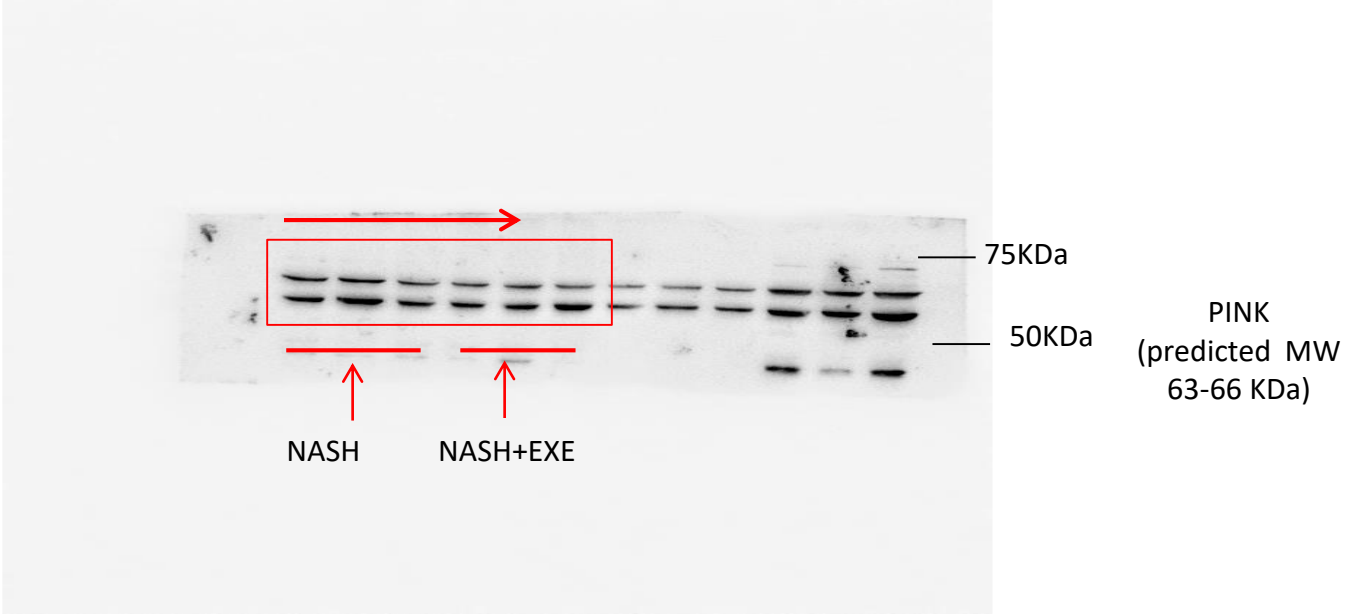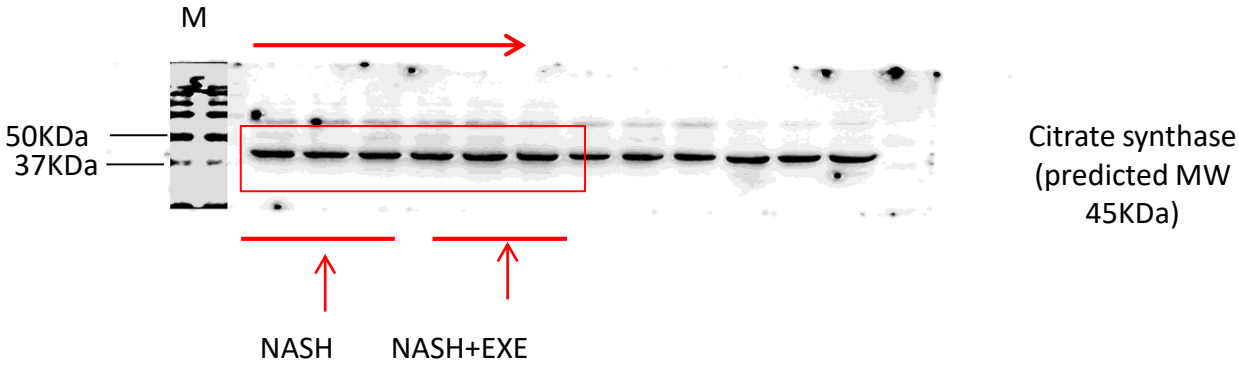

**Figure 9C**

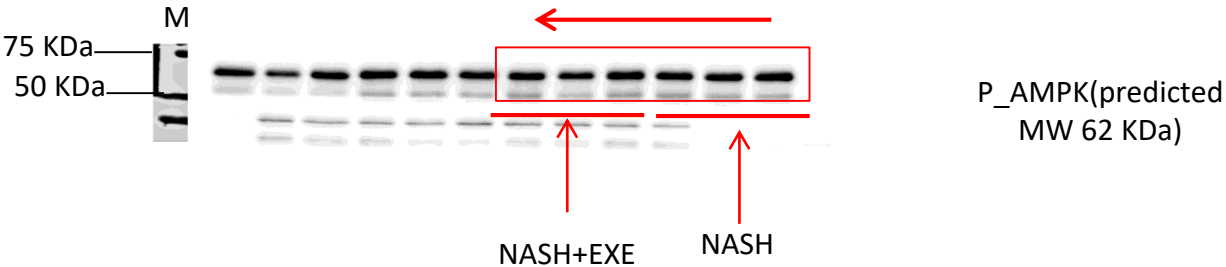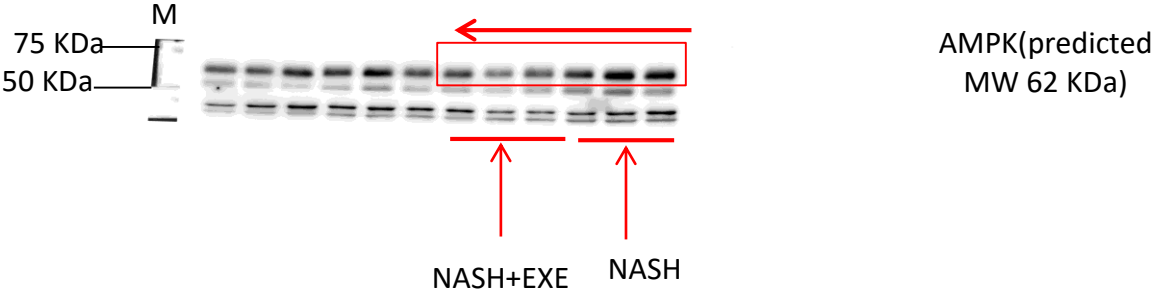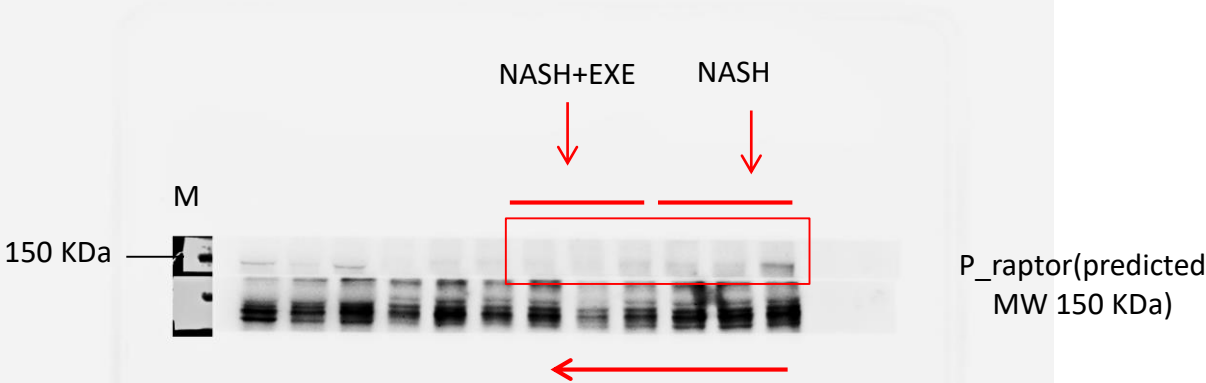

Figure 9C continued

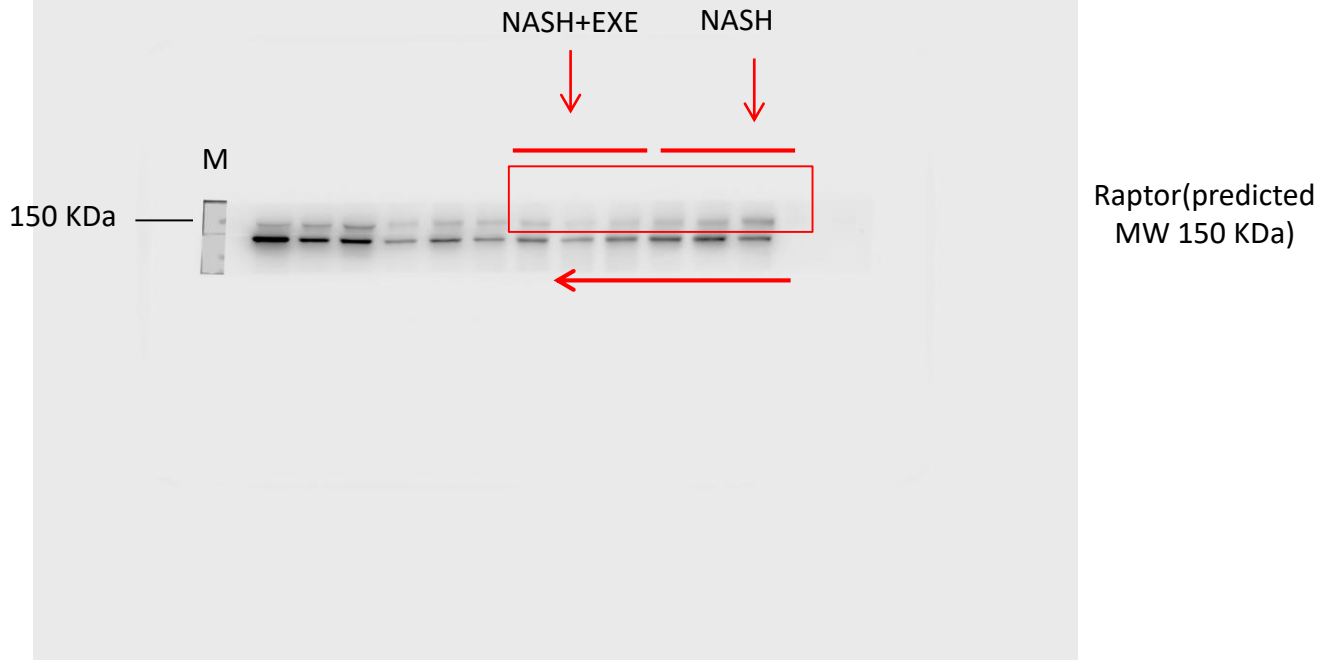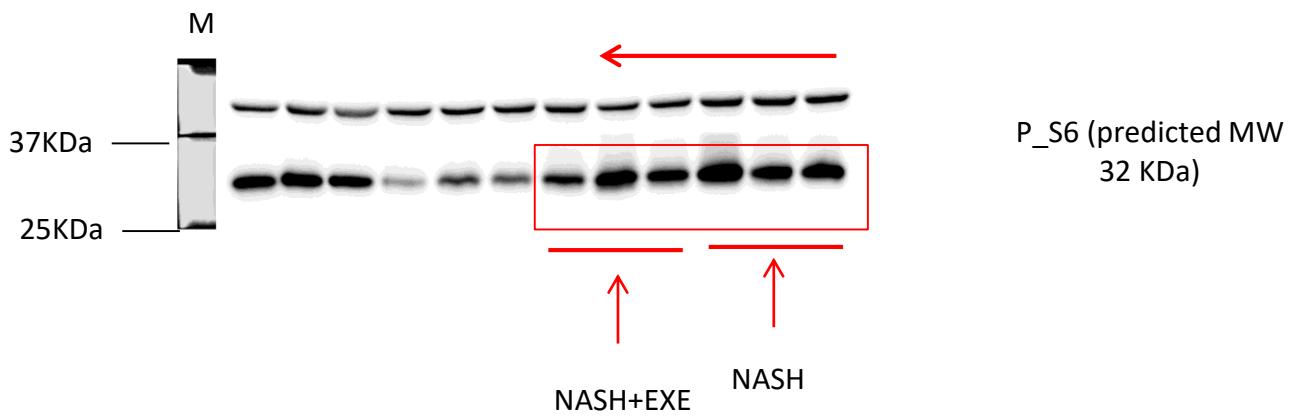

Figure 9C continued

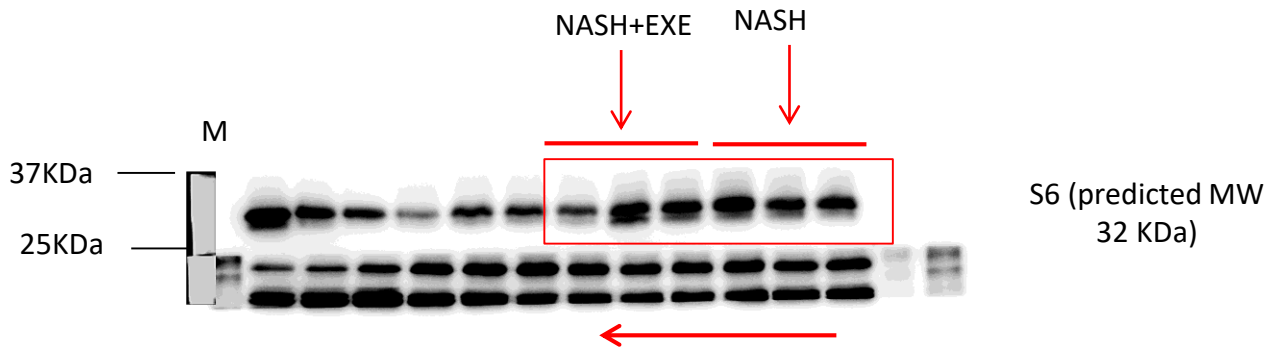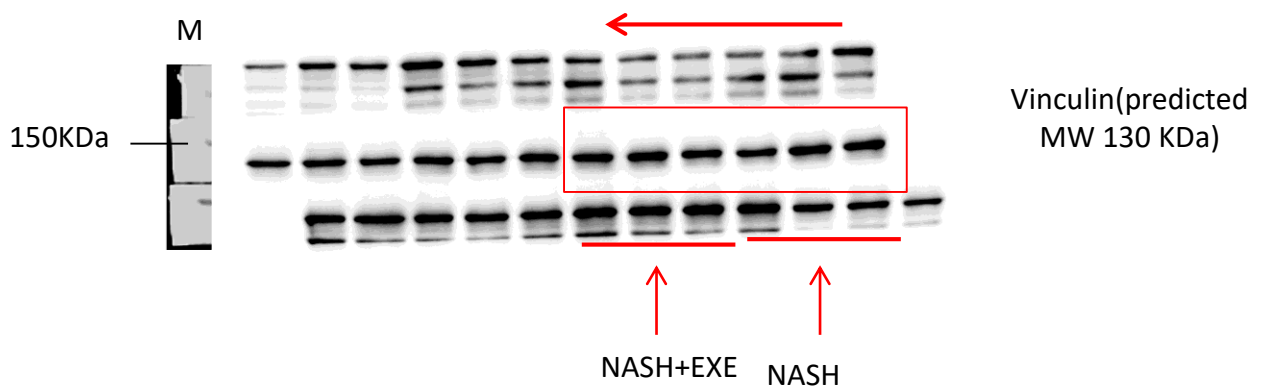

**Figure 10 D**

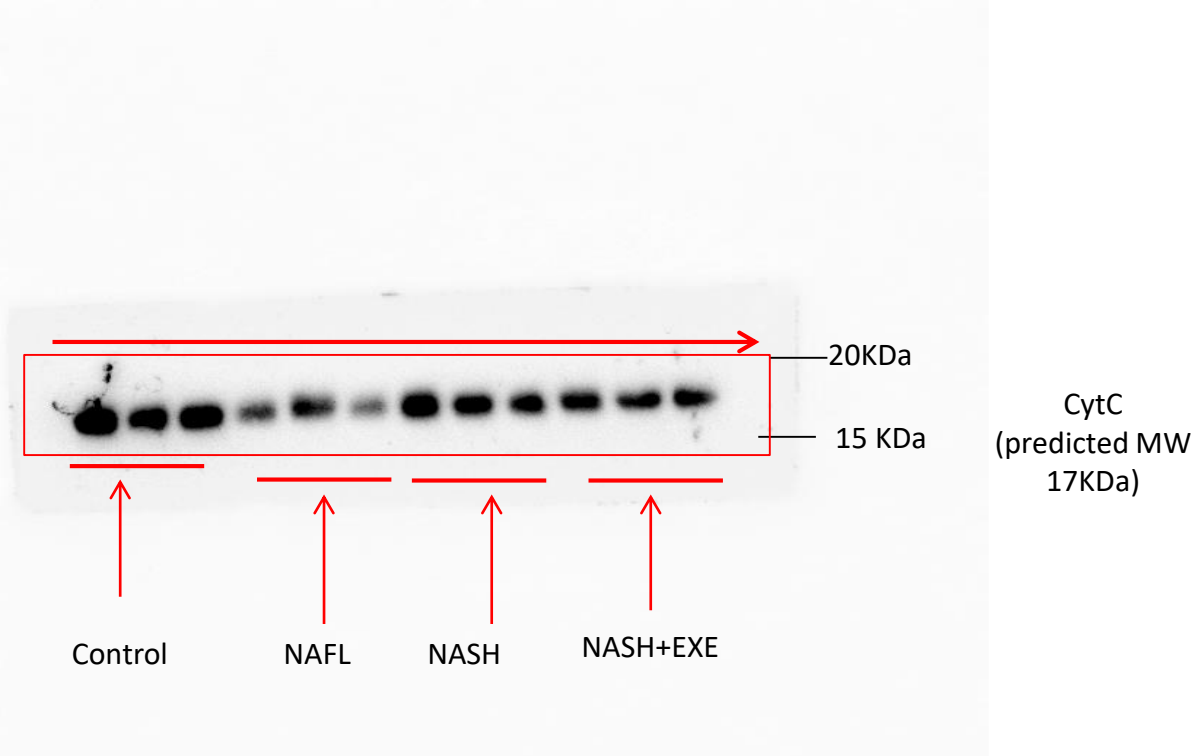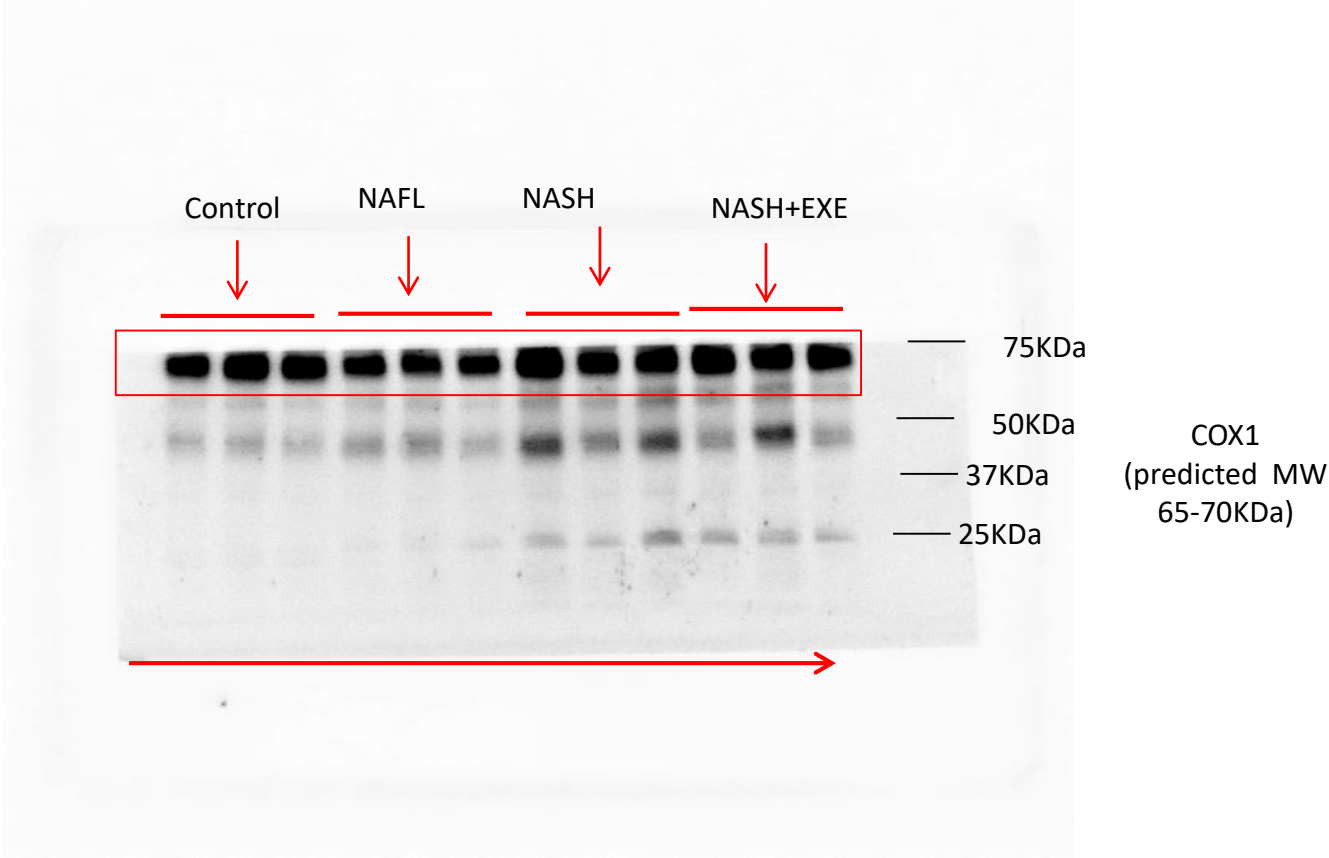



Figure 10 D continued

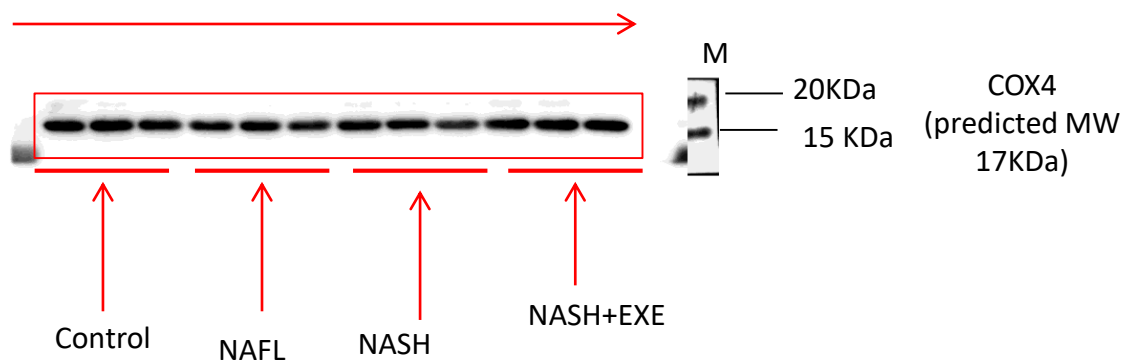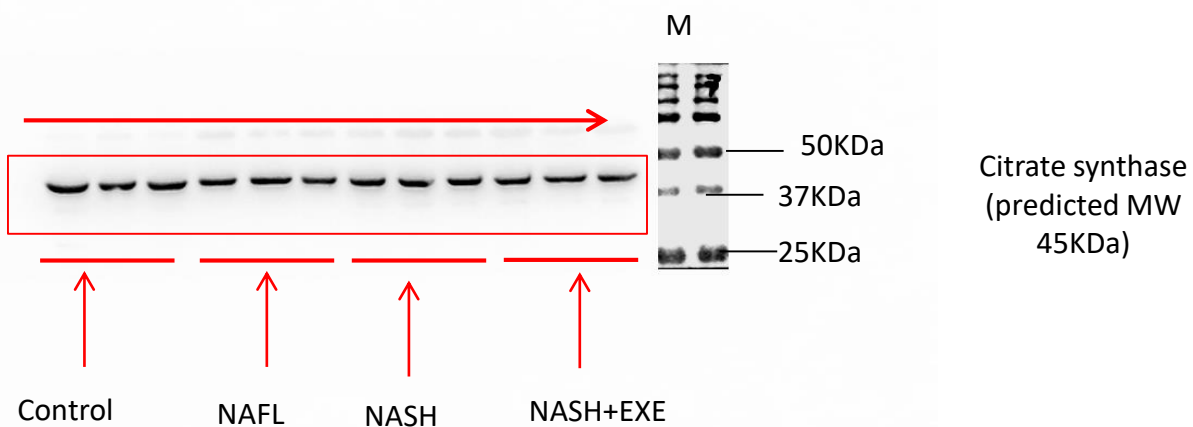

**Figure 10 E**

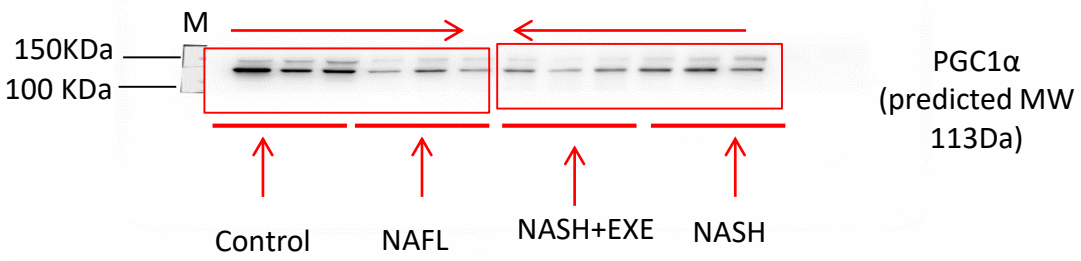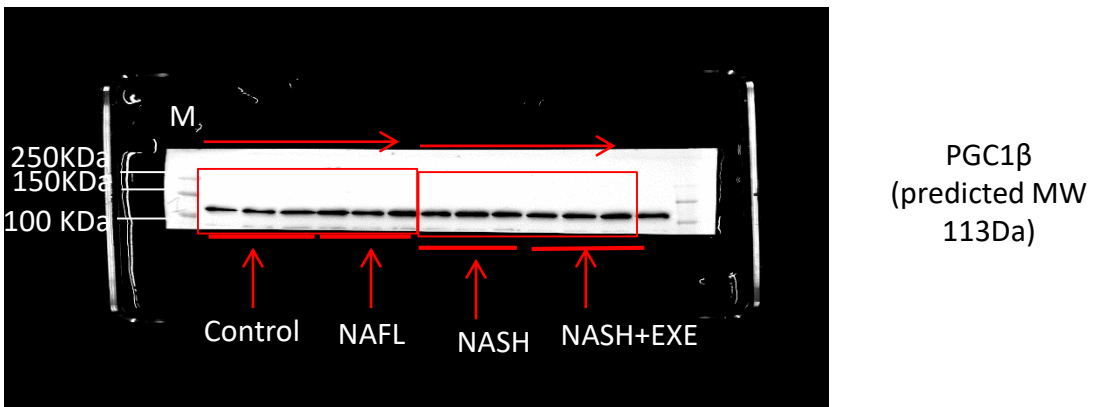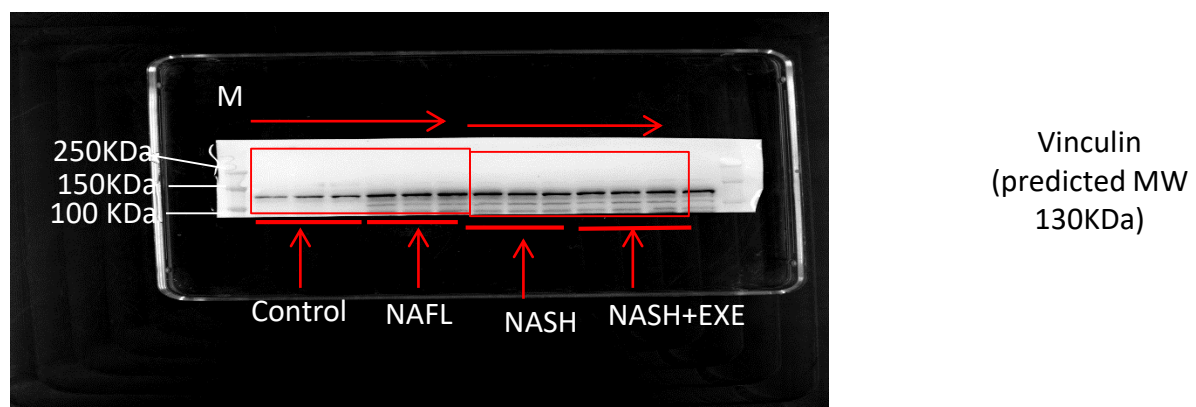

**Figure 11B**

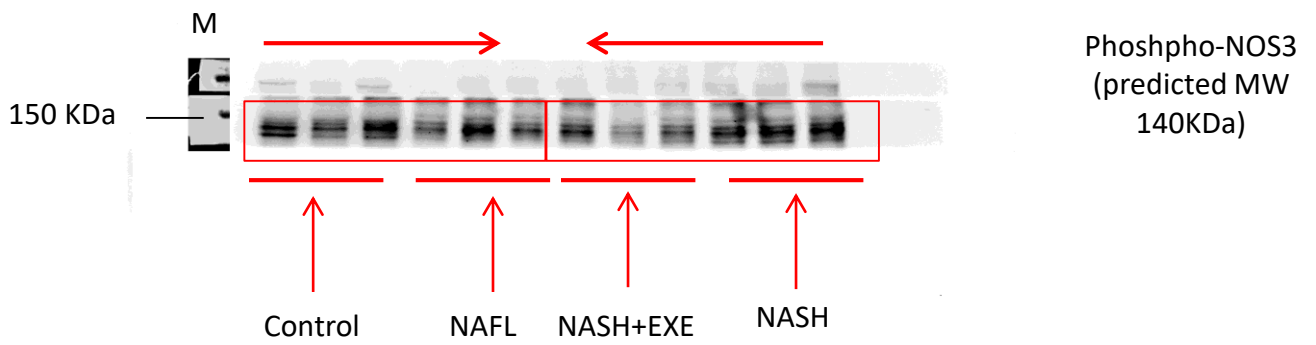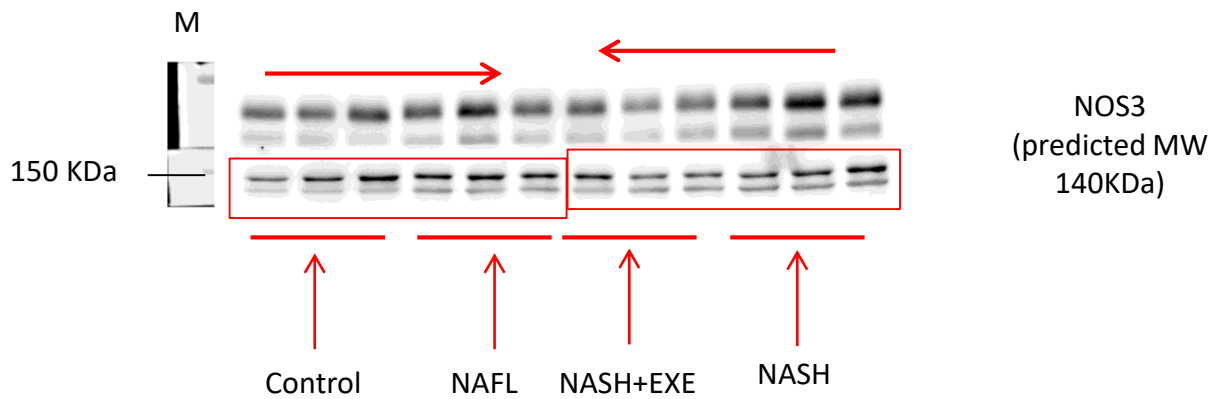

Figure 11B continued

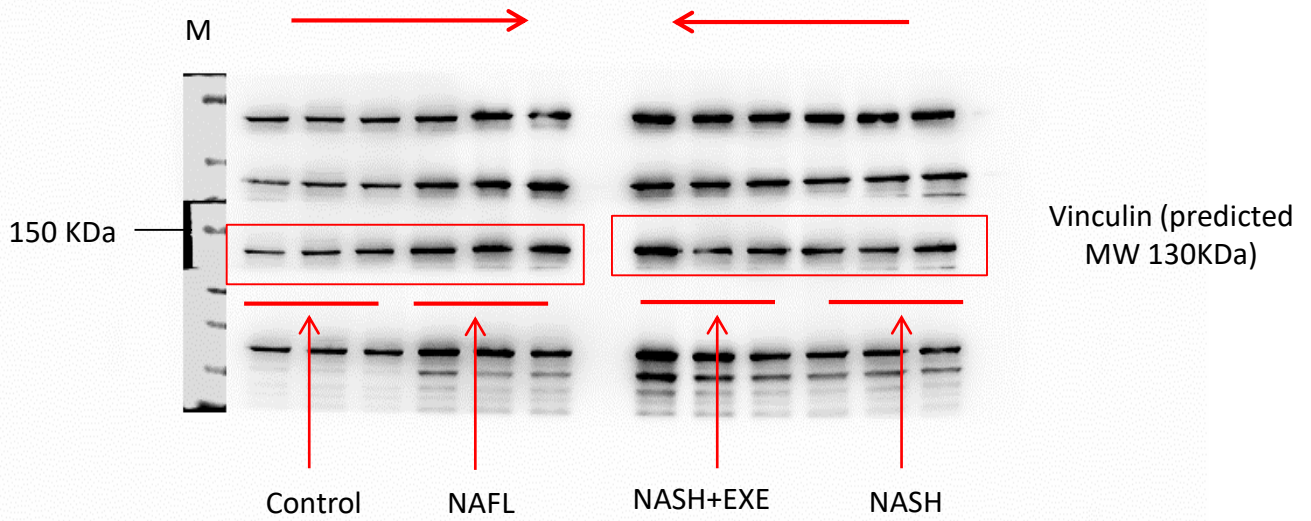

**Figure 12**

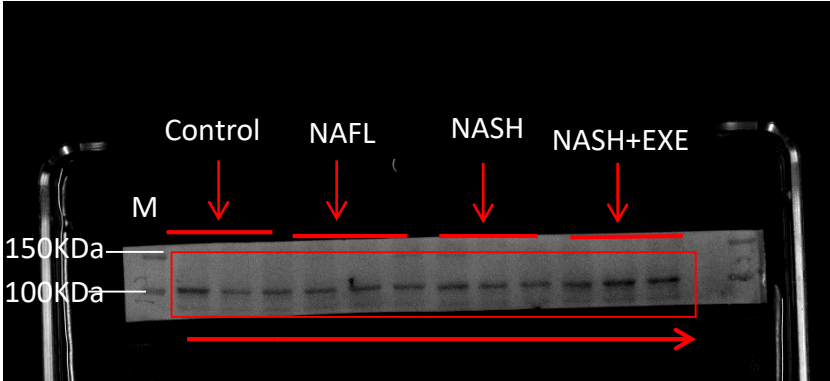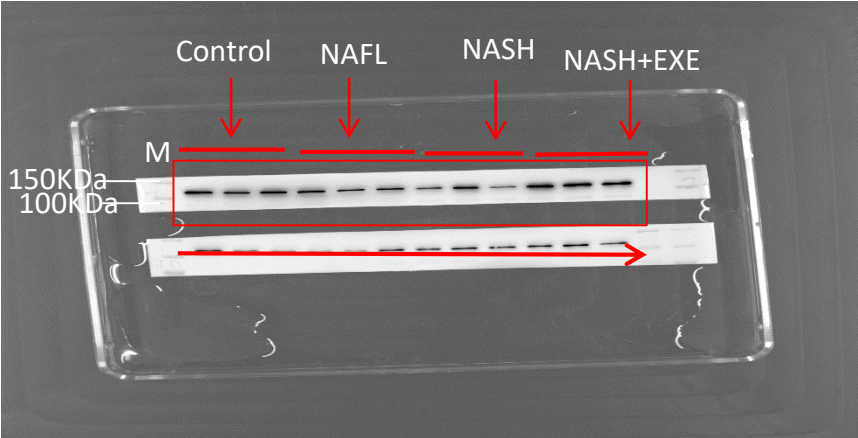

**Figure 12 continued**

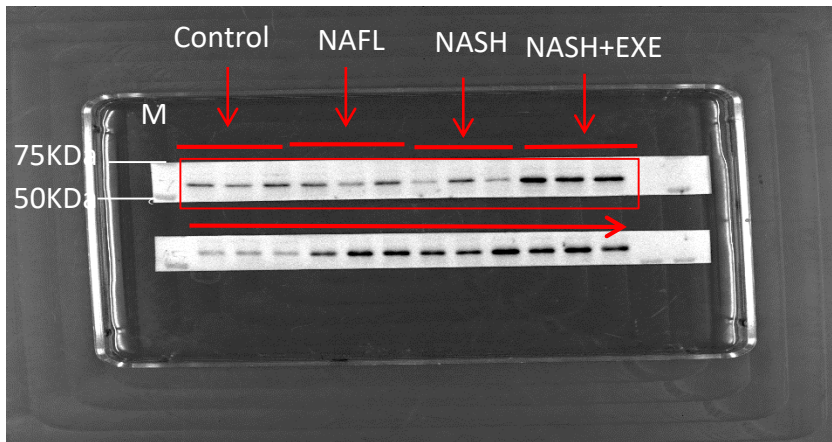

Phospho Akt  
(predicted MW  
60Da)

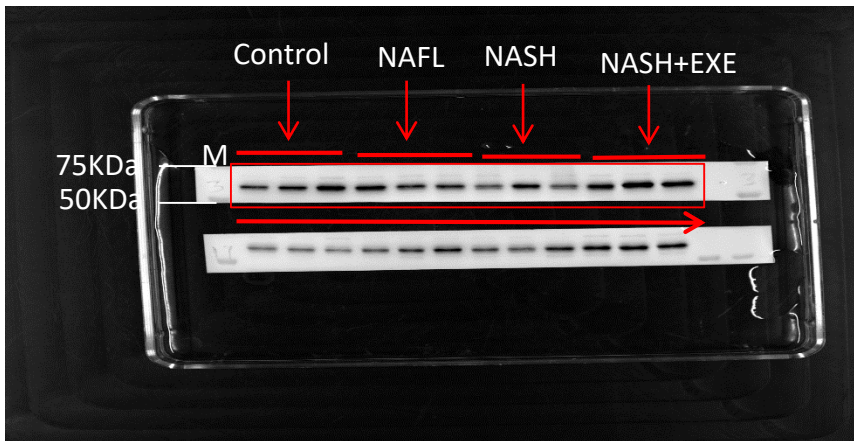

Akt  
(predicted MW  
60Da)

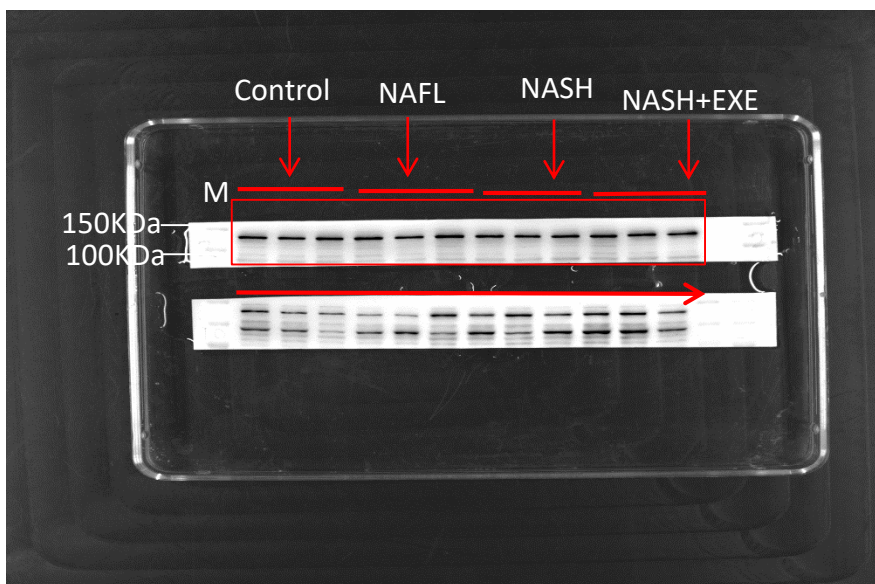

Vinculin  
(predicted MW  
130KDa)

**Table S1**

| Composition of standard and choline-deficient high-fat diets |                                   |                            |
|--------------------------------------------------------------|-----------------------------------|----------------------------|
| Ingredient                                                   | Standard diet<br>(E15668-04)<br>% | CD-HFD<br>(E15673-94)<br>% |
| Corn starch, pre-gelatinated                                 | 40.00                             | 10.00                      |
| Maltodextrin                                                 | 10.00                             | 6.00                       |
| Sucrose                                                      | 18.29                             | 22.00                      |
| Cellulose, microcrystalline                                  | 5.00                              | 4.95                       |
| <b>Amino acid mixture</b>                                    | <b>14.53</b>                      | <b>14.37</b>               |
| Vitamin premix AIN w/o choline                               | 1.00                              | 1.00                       |
| Mineral & trace element premix                               | 3.50                              | 3.50                       |
| Choline Cl (50%)                                             | 0.25                              | -                          |
| Sodium bicarbonate                                           | 0.43                              | 0.43                       |
| Cholesterol                                                  | -                                 | 2.10                       |
| Coconut oil, hydrogenated                                    | -                                 | -                          |
| Corn oil                                                     | 5.00                              | -                          |
| Pork lard                                                    | -                                 | 34.60                      |
| Soybean oil                                                  | 2.00                              | 1.00                       |
| <b>Composition of the amino acid mixture</b>                 |                                   |                            |
| L-Lysine HCl                                                 | 0.91                              | 0.91                       |
| L-Methionine                                                 | 0.40                              | 0.17                       |
| L-Cystine                                                    | 0.30                              | 0.37                       |
| L-Threonine                                                  | 0.46                              | 0.46                       |
| <b>Energy contribution of diet components</b>                |                                   |                            |
| Energy (Atwater) MJ/Kg                                       | 16.60                             | 22.50                      |
| Kcal% Protein                                                | 12.00                             | 9.00                       |
| Kcal% Fat                                                    | 16.00                             | 60.00                      |
| Kcal% Carbohydrates                                          | 72.00                             | 31.00                      |

The diets and their compositions were provided by Ssniff Spezialdiäten GmbH, Germany.

| <b>Table S2</b> |                                                  |                           |                   |
|-----------------|--------------------------------------------------|---------------------------|-------------------|
| <b>S.No</b>     | <b>Reagent</b>                                   | <b>Source</b>             | <b>Identifier</b> |
| 1               | Rabbit polyclonal anti-phospho ATP citrate lyase | Cell Signaling Technology | Cat #4331         |
| 2               | Rabbit polyclonal anti-ATP citrate lyase         | Cell Signaling Technology | Cat #4332         |
| 3               | Rabbit monoclonal anti-fatty acid synthase       | Cell Signaling Technology | Cat #3180         |
| 4               | Rabbit polyclonal anti-Phospho (S563)-HSL        | Cell Signaling Technology | Cat #4139         |
| 5               | Rabbit polyclonal anti-Phospho (S565)-HSL        | Cell Signaling Technology | Cat #4137         |
| 6               | Rabbit polyclonal anti-HSL                       | Cell Signaling Technology | Cat #4107         |
| 7               | Rabbit polyclonal anti-perilipin 2               | Proteintech               | Cat #15294-1-AP   |
| 8               | Rabbit monoclonal anti-ATGL                      | Cell Signaling Technology | Cat #2439         |
| 9               | Rabbit polyclonal anti-PPAR $\alpha$             | Santa Cruz Biotechnology  | Cat #sc-9000      |
| 10              | Rabbit polyclonal anti-CPT1A                     | Proteintech               | Cat #15184-1-AP   |
| 11              | Mouse monoclonal anti-MCAD                       | Abcam                     | Cat #ab110296     |
| 12              | Rabbit polyclonal anti-DGAT1                     | Abnova                    | Cat #PAB8674      |
| 13              | Goat polyclonal anti-DGAT2                       | Novus Biologicals         | Cat #NB100-57851  |
| 14              | Mouse monoclonal anti-vinculin                   | Merck Milipore            | Cat #CP74         |
| 15              | Rabbit polyclonal anti-(GRP78) BiP               | Thermo Fisher             | Cat #PA5-34941    |
| 16              | Rabbit polyclonal anti-XBP1s                     | Cell Signaling Technology | Cat #83418        |
| 17              | Mouse monoclonal anti-CHOP                       | Cell Signaling Technology | Cat #2895         |
| 18              | Rabbit polyclonal anti-Bax                       | Cell Signaling Technology | Cat #2772         |
| 19              | Rabbit polyclonal anti-Bcl2                      | Cell Signaling Technology | Cat #2876         |
| 20              | Rabbit polyclonal anti-phospho mTOR              | Cell Signaling Technology | Cat #2971         |



| <b>Table S2 continued</b> |                                           |                           |                   |
|---------------------------|-------------------------------------------|---------------------------|-------------------|
| <b>S.No</b>               | <b>Reagent</b>                            | <b>Source</b>             | <b>Identifier</b> |
| 21                        | Rabbit monoclonal anti-mTOR               | Cell Signaling Technology | Cat #2983         |
| 22                        | Rabbit monoclonal anti-ATG5               | Cell Signaling Technology | Cat #12994        |
| 23                        | Rabbit polyclonal anti-LC3B               | Abcam                     | Cat #ab48394      |
| 24                        | Rabbit polyclonal anti-phospho PINK       | Affinity Biosciences      | Cat #AF7081       |
| 25                        | Rabbit polyclonal anti-PINK               | Cayman Chemical           | Cat #10006283     |
| 26                        | Rabbit monoclonal anti-citrate synthase   | Cell Signaling Technology | Cat #14309        |
| 27                        | Rabbit polyclonal anti-phospho AMPK       | Cell Signaling Technology | Cat #2531         |
| 28                        | Rabbit polyclonal anti-AMPK               | Cell Signaling Technology | Cat #2532         |
| 29                        | Rabbit polyclonal anti-phospho raptor     | Cell Signaling Technology | Cat #2083         |
| 30                        | Rabbit monoclonal anti-raptor             | Cell Signaling Technology | Cat #2280         |
| 31                        | Rabbit polyclonal anti-phospho S6         | Cell Signaling Technology | Cat #2215         |
| 32                        | Rabbit monoclonal anti-S6                 | Cell Signaling Technology | Cat #2217         |
| 33                        | Rabbit polyclonal anti-cytochrome C       | Cell Signaling Technology | Cat #4272         |
| 34                        | Rabbit polyclonal anti-(MTCO1)COX1        | Novus Biologicals         | Cat #NBP2-29949   |
| 35                        | Rabbit polyclonal anti-COXIV              | Proteintech               | Cat #11242-1-AP   |
| 36                        | Mouse monoclonal anti-PGC1 $\alpha$       | Merck Milipore            | Cat #ST1202       |
| 37                        | Rabbit monoclonal anti-PGC1 $\beta$       | Abcam                     | Cat #ab176328     |
| 38                        | Rabbit polyclonal anti-phospho NOS3       | Cell Signaling Technology | Cat #9571         |
| 39                        | Mouse monoclonal anti-NOS3                | BD biosciences            | Cat #610297       |
| 40                        | Rabbit polyclonal anti-phospho (S473) AKT | Cell Signaling Technology | Cat #9271         |
| 41                        | Rabbit polyclonal anti-AKT                | Cell Signaling Technology | Cat #9272         |

| <b>Table S3</b> |                   |            |                    |                                    |                          |
|-----------------|-------------------|------------|--------------------|------------------------------------|--------------------------|
| <b>S.No</b>     | <b>Assay ID</b>   | <b>Dye</b> | <b>Gene Symbol</b> | <b>Gene Name</b>                   | <b>Identifier</b>        |
| 1               | Mm99999056_m<br>1 | FAM        | Ccl2               | Chemokine ligand 2 MCP-1           | Thermo Fisher Scientific |
| 2               | Mm01135198_m<br>1 | FAM        | Cd36               | CD36 antigen                       | Thermo Fisher Scientific |
| 3               | Mm00439560_m<br>1 | FAM        | IGF1               | Insulin-like growth factor 1       | Thermo Fisher Scientific |
| 4               | Mm00439564_m<br>1 | FAM        | IGF2               | Insulin-like growth factor 2       | Thermo Fisher Scientific |
| 5               | Mm00449517_m<br>1 | FAM        | FATP2              | Fatty acid transporter, member 2   | Thermo Fisher Scientific |
| 6               | Mm00447768_m<br>1 | FAM        | FATP5              | Fatty acid transporter, member 5   | Thermo Fisher Scientific |
| 7               | Mm01178820_m<br>1 | FAM        | Tgfb1              | Transforming growth factor, beta 1 | Thermo Fisher Scientific |
| 8               | Mm00437762 PL     | VIC        | B2m                | B-microglobulin Primer Limited     | Thermo Fisher Scientific |
| 9               | Mm00443258_m<br>1 | FAM        | TNF                | Tumor necrosis factor              | Thermo Fisher Scientific |
| 10              | Mm00446190_m<br>1 | FAM        | Il6                | Interleukin 6                      | Thermo Fisher Scientific |
| 11              | Mm00840165_g1     | FAM        | FGF21              | Fibroblast growth factor 21        | Thermo Fisher Scientific |
